# Supplementary material
Source: PubMed Central journal article supplement (PMC6143098)
Supplement: jama-320-995-s002.pdf [file jama-320-995-s002.pdf]

## Supplementary Online Content

Alexander S, Fisher BT, Gaur AH, et al. Effect of levofloxacin prophylaxis on bacteremia in children with acute leukemia or undergoing hematopoietic stem cell transplantation. *JAMA*. doi:10.1001/jama.2018.12512

**eTable 1.** Diagnosis of all eligible patients undergoing autologous or allogeneic stem cell transplant by allocation

**eTable 2.** Chemotherapy, conditioning and graft versus host disease prophylaxis by allocation of all eligible patients

**eTable 3.** Organisms causing bacteremia by allocation

**eTable 4.** Clinical characteristics of patients evaluable and not evaluable for acquisition of resistance for selected intestinal organisms

This supplementary material has been provided by the authors to give readers additional information about their work.

**eTable 1. Diagnosis of all eligible patients undergoing autologous or allogeneic stem cell transplant by allocation**

| Group and Diagnosis                                        | Hematopoietic Stem Cell Transplantation |                        |
|------------------------------------------------------------|-----------------------------------------|------------------------|
|                                                            | Levofloxacin (N=211)                    | No Prophylaxis (N=208) |
| Autologous Hematopoietic Stem Cell Transplantation (N=157) |                                         |                        |
| Neuroblastoma                                              | 41                                      | 39                     |
| Hodgkin lymphoma                                           | 14                                      | 11                     |
| Central nervous system tumor                               | 9                                       | 11                     |
| Other malignant disease                                    | 14                                      | 16                     |
| Non-malignant disease                                      | 1                                       | 1                      |
|                                                            |                                         |                        |
| Allogeneic Hematopoietic Stem Cell Transplantation (N=262) |                                         |                        |
| ALL                                                        | 54                                      | 46                     |
| AML                                                        | 29                                      | 34                     |
| Other hematologic malignancy                               | 17                                      | 20                     |
| Other malignant disease                                    | 8                                       | 6                      |
| Non-malignant disease                                      | 24                                      | 24                     |

**eTable 2. Chemotherapy, conditioning and graft versus host disease prophylaxis by allocation of all eligible patients**

| Chemotherapy                                           | Acute Leukemia<br>(N=381 Chemotherapy Cycles in 198 Patients) |                                  |
|--------------------------------------------------------|---------------------------------------------------------------|----------------------------------|
|                                                        | Levofloxacin<br>(N=185 cycles)                                | No Prophylaxis<br>(N=196 cycles) |
| <i>Acute Myeloid Leukemia</i>                          |                                                               |                                  |
| Cytarabine, daunorubicin, etoposide                    | 39                                                            | 39                               |
| Cytarabine, etoposide                                  | 34                                                            | 42                               |
| Mitoxantrone, cytarabine                               | 21                                                            | 17                               |
| Other                                                  | 27                                                            | 27                               |
| Missing                                                | 1                                                             | 1                                |
| <i>Acute Lymphoblastic Leukemia</i>                    |                                                               |                                  |
| Mitoxantrone, vincristine, dexamethasone, asparaginase | 10                                                            | 11                               |
| Cytarabine, asparaginase                               | 12                                                            | 14                               |
| Cyclophosphamide, etoposide                            | 10                                                            | 20                               |
| Other                                                  | 26                                                            | 25                               |
| Missing                                                | 5                                                             | 0                                |
| Conditioning                                           | HSCT (N=419 Patients)                                         |                                  |
|                                                        | Levofloxacin<br>(N=211)                                       | No Prophylaxis<br>(N=208)        |
| <i>Autologous HSCT (N=157)</i>                         |                                                               |                                  |
| Busulfan/melphalan                                     | 28                                                            | 32                               |
| Carboplatin based                                      | 23                                                            | 26                               |
| Other                                                  | 28                                                            | 20                               |
| <i>Allogeneic HSCT (N=262)</i>                         |                                                               |                                  |
| Total body irradiation based                           | 62                                                            | 56                               |
| Busulfan based                                         | 47                                                            | 57                               |
| Other                                                  | 22                                                            | 17                               |
| Unknown                                                | 1                                                             | 0                                |
| GVHD Prophylaxis                                       | Only Allogeneic HSCT (N=262 Patients)                         |                                  |
|                                                        | Levofloxacin<br>(N=132)                                       | No Prophylaxis<br>(N=130)        |
| Calcineurin inhibitor alone                            | 11                                                            | 9                                |
| Calcineurin inhibitor and methotrexate                 | 69                                                            | 68                               |
| Calcineurin inhibitor and mycophenolate mofetil        | 27                                                            | 28                               |
| Other                                                  | 23                                                            | 25                               |
| None                                                   | 2                                                             | 0                                |
| Serotherapy                                            | Only Allogeneic HSCT (N=262 Patients)                         |                                  |
|                                                        | Levofloxacin<br>(N=132)                                       | No Prophylaxis<br>(N=130)        |
| Alemtuzumab or anti-thymocyte globulin                 | 57                                                            | 62                               |
| None                                                   | 75                                                            | 68                               |

Abbreviations: HSCT – hematopoietic stem cell transplantation

**eTable 3: Organisms causing bacteremia by allocation<sup>a</sup>**

|                                                | Levofloxacin   | No prophylaxis |
|------------------------------------------------|----------------|----------------|
| <b>Acute Leukemia</b>                          |                |                |
| <b>Gram Positive</b>                           | <b>19</b>      | <b>27</b>      |
| Viridans group streptococci                    | 13             | 23             |
| Coagulase negative staphylococci               | 4              | 1              |
| <i>Staphylococcus aureus</i>                   | 0              | 0              |
| Other Gram positive                            | 2 <sup>b</sup> | 3 <sup>c</sup> |
| <b>Gram Negative</b>                           | <b>5</b>       | <b>20</b>      |
| <i>Escherichia coli</i>                        | 2              | 7              |
| <i>Pseudomonas aeruginosa</i>                  | 1              | 4              |
| <i>Klebsiella pneumoniae</i>                   | 1              | 2              |
| <i>Enterobacter cloacae</i>                    | 1              | 1              |
| Other Gram negative                            | 0              | 6 <sup>d</sup> |
| <b>Hematopoietic Stem Cell Transplantation</b> |                |                |
| <b>Gram Positive</b>                           | <b>18</b>      | <b>27</b>      |
| Viridans group streptococci                    | 12             | 16             |
| Coagulase negative staphylococci               | 2              | 3              |
| <i>Staphylococcus aureus</i>                   | 0              | 4              |
| Other Gram positive                            | 4 <sup>e</sup> | 4 <sup>f</sup> |
| <b>Gram Negative</b>                           | <b>6</b>       | <b>14</b>      |
| <i>Escherichia coli</i>                        | 4              | 5              |
| <i>Pseudomonas aeruginosa</i>                  | 0              | 2              |
| <i>Klebsiella</i> species                      | 1              | 1              |
| <i>Enterobacter cloacae</i>                    | 0              | 1              |
| Other Gram negative                            | 1 <sup>g</sup> | 5 <sup>h</sup> |

<sup>a</sup> 136 organisms identified in 123 episodes of bacteremia

<sup>b</sup> *Clostridium* species, *Stomatococcus mucilaginosus*

<sup>c</sup> *Stomatococcus mucilaginosus* (2), *Streptococcus agalactiae*

<sup>d</sup> *Haemophilus influenzae*, *Moraxella catarrhalis*, *Eikenella corrodens*, *Fusobacterium nucleatum*, *Neisseria* species, *Kingella kingae*

<sup>e</sup> Streptococci species, *Gemella* species, *Granulicatella adiacens*, *Rothia mucilaginosus* (formerly *Stomatococcus mucilaginosus*)

<sup>f</sup> *Streptococcus pneumoniae*, *Enterococcus faecalis*, nutritionally variant streptococcus, *Streptococcus agalactiae*

<sup>g</sup> *Chryseomonas luteola*

<sup>h</sup> *Bacteroides fragilis*, *Fusobacterium* species, *Leptotrichia trevisanii* (2), *Morganella morganii*

**eTable 4. Clinical characteristics of patients evaluable and not evaluable for acquisition of resistance for selected intestinal organisms (N=617)**

|                                       | <b>Evaluable for Development of Resistance (N=326)</b> | <b>Not Evaluable for Development of Resistance (N=291)</b> |
|---------------------------------------|--------------------------------------------------------|------------------------------------------------------------|
| Treatment Assignment, n (%)           |                                                        |                                                            |
| Levofloxacin                          | 161 (49.4)                                             | 149 (51.2)                                                 |
| No prophylaxis                        | 165 (50.6)                                             | 142 (48.8)                                                 |
| Acute Leukemia, n (%)                 |                                                        |                                                            |
| Acute myeloid leukemia                | 65/88 (73.9)                                           | 63/110 (57.3)                                              |
| Relapsed acute lymphoblastic leukemia | 23/88 (26.1)                                           | 47/110 (42.7)                                              |
| HSCT, n (%)                           |                                                        |                                                            |
| Autologous transplantation            | 79/238 (33.2)                                          | 78/181 (43.1)                                              |
| Allogeneic transplantation            | 159/238 (66.8)                                         | 103/181 (56.9)                                             |
| Median Age in Years, (IQR)            | 7 (3-13)                                               | 11 (5-16)                                                  |
| Male, n (%)                           | 191 (58.6)                                             | 182 (62.5)                                                 |
| Race, n (%)                           |                                                        |                                                            |
| White                                 | 220 (67.5)                                             | 207 (71.1)                                                 |
| Black                                 | 45 (13.8)                                              | 35 (12.0)                                                  |
| Asian                                 | 26 (8.0)                                               | 13 (4.5)                                                   |
| Other or unknown                      | 35 (10.7)                                              | 36 (12.4)                                                  |
| Ethnicity, n (%)                      |                                                        |                                                            |
| Non-Hispanic                          | 246 (75.5)                                             | 204 (70.1)                                                 |
| Hispanic                              | 72 (22.1)                                              | 71 (24.4)                                                  |
| Unknown                               | 8 (2.5)                                                | 16 (5.5)                                                   |

Abbreviations: HSCT – hematopoietic stem cell transplantation; IQR – interquartile range
